# Supplementary material for: Prediction of the 1-Year Risk of Incident Lung Cancer: Prospective Study Using Electronic Health Records from the State of Maine
Source: PubMed Central journal article supplement (PMC6542253; doi:10.2196/13260), 2019-05-16
Supplement: jmir_v21i5e13260_app1.pdf [file jmir_v21i5e13260_app1.pdf]

### Multimedia Appendix 1

List of social determinant variables downloaded from the US census, detailed in the data source and mapping method.

|    | <b>Social Determinants</b>                               | <b>Levels</b>                                                                                                           | <b>Variable Type</b> | <b>Mapping Method</b> | <b>Data Source</b>                                                                        |
|----|----------------------------------------------------------|-------------------------------------------------------------------------------------------------------------------------|----------------------|-----------------------|-------------------------------------------------------------------------------------------|
| 1  | Racial Demographics                                      | Four levels: White; Black/African American; American Indian; Asian                                                      | %                    | ZIP code              | US Census ACS (American Community Survey)                                                 |
| 2  | Urban or Rural                                           | Two levels: Urban ratio; Rural ratio                                                                                    | %                    | ZIP code              |                                                                                           |
| 3  | Nativity and Citizenship                                 |                                                                                                                         | %                    | ZIP code              |                                                                                           |
| 4  | Education level                                          | Four levels: Less than High school; High School; College associate bachelor; Graduate degree.                           | %                    | ZIP code              |                                                                                           |
| 5  | English proficiency                                      |                                                                                                                         | %                    | ZIP code              |                                                                                           |
| 6  | Health insurance status                                  | Six levels:<br>Public: Medicare; Medicaid; VA health care.<br>Private: Employ based; Direct purchase; Tricare/military. | %                    | ZIP code              |                                                                                           |
| 7  | Poverty or Household income                              |                                                                                                                         | %                    | ZIP code              |                                                                                           |
| 8  | Unemployment rate                                        |                                                                                                                         | %                    | ZIP code              |                                                                                           |
| 9  | Percentage of population living within half mile to park |                                                                                                                         | %                    | County level          | Centers for Disease Control and Prevention, Community Health Status Indicators (CDC CHSI) |
| 10 | GINI inequality index                                    |                                                                                                                         | [0,1]                | ZIP code              | US Census (ACS)                                                                           |
| 11 | Social Vulnerability Index                               |                                                                                                                         | [0,1]                | County level          | CDC or Agency for Toxic Substances and Disease Registry (ATSDR)                           |
