# Supplementary material for: Prediction of the 1-Year Risk of Incident Lung Cancer: Prospective Study Using Electronic Health Records from the State of Maine
Source: PubMed Central journal article supplement (PMC6542253; doi:10.2196/13260), 2019-05-16
Supplement: jmir_v21i5e13260_app4.pdf [file jmir_v21i5e13260_app4.pdf]

#### Multimedia Appendix 4

The performance of the one-year lung cancer risk prediction model in the prospective cohort, summarized in PPV, sensitivity, specificity and mean relative risk.

| <b>Risk Category</b>      | <b>Low</b> | <b>Medium</b> | <b>High</b> | <b>Total</b> |
|---------------------------|------------|---------------|-------------|--------------|
| <b>Intervals</b>          | [0-0.0045] | [0.0045-0.01] | [0.01-1]    |              |
| <b>Number of Patient</b>  | 673,075    | 109,662       | 53,922      | 836,659      |
| <b>True Positive</b>      | 262        | 326           | 579         | 1,167        |
| <b>PPV (%)</b>            | 0.04       | 0.3           | 1.07        |              |
| <b>Sensitivity (%)</b>    | 22.45      | 27.93         | 49.61       |              |
| <b>Specificity(%)</b>     | 80.53      | 13.09         | 6.38        |              |
| <b>Mean Relative Risk</b> | 0.28       | 2.13          | 7.7         |              |
