# Supplementary material for: Prediction of the 1-Year Risk of Incident Lung Cancer: Prospective Study Using Electronic Health Records from the State of Maine
Source: PubMed Central journal article supplement (PMC6542253; doi:10.2196/13260), 2019-05-16
Supplement: jmir_v21i5e13260_app5.pdf [file jmir_v21i5e13260_app5.pdf]

## Multimedia Appendix 5

The top 60 features selected by our lung cancer prediction model.

| Characteristic                          | Prospective cohort<br>(N=836,659) | Case<br>(N=1,167)<br>n (%) | Control<br>(N=835,492)<br>n (%) | OR(95% CI)           | P value |
|-----------------------------------------|-----------------------------------|----------------------------|---------------------------------|----------------------|---------|
| <b>Age</b>                              |                                   |                            |                                 |                      |         |
| <45                                     | 366,752                           | 20 ( 1.71% )               | 366,732 ( 43.89% )              | 0.022(0.014-0.034)   | <0.001  |
| 45-54                                   | 109,986                           | 70 ( 6.00% )               | 109,916 ( 13.16% )              | 0.369(0.278-0.480)   | <0.001  |
| 55-64                                   | 139,219                           | 241 ( 20.65% )             | 138,978 ( 16.63% )              | 1.206(1.040-1.392)   | 0.012   |
| ≥65                                     | 220,702                           | 836 ( 71.64% )             | 219,866 ( 26.32% )              | 7.480(6.567-8.544)   | <0.001  |
| <b>Gender</b>                           |                                   |                            |                                 |                      |         |
| Male                                    | 369,022                           | 558 ( 47.81% )             | 368,464 ( 44.10% )              | 1.16(1.04-1.30)      | 0.011   |
| <b>Smoking</b>                          |                                   |                            |                                 |                      |         |
|                                         | 14,248                            | 65 ( 5.57% )               | 14,183 ( 1.70% )                | 4.084(3.144-5.21)    | <0.001  |
| <b>Pulmonary Diseases</b>               |                                   |                            |                                 |                      |         |
| COPD                                    | 36,221                            | 354 ( 30.33% )             | 35,867 ( 4.29% )                | 4.978 ( 4.379-5.648) | <0.001  |
| Pneumonia                               | 12,179                            | 71 ( 6.08% )               | 12,108 ( 1.45% )                | 2.79 ( 2.172-3.525)  | <0.001  |
| Other respiratory disorders             | 5,743                             | 65 ( 5.57% )               | 5,678 ( 0.68% )                 | 5.484 ( 4.219-7)     | <0.001  |
| <b>Other cancer history</b>             |                                   |                            |                                 |                      |         |
|                                         | 72,073                            | 339 ( 29.05% )             | 71,734 ( 8.59% )                | 1.899 ( 1.667-2.159) | <0.001  |
| <b>Other chronic diseases</b>           |                                   |                            |                                 |                      |         |
| Diabetes                                | 70,005                            | 230 ( 19.71% )             | 69,775 ( 8.35% )                | 1.329 ( 1.146-1.535) | <0.001  |
| CVDs                                    | 161,685                           | 524 ( 44.90% )             | 161,161 ( 19.29% )              | 1.374 ( 1.219-1.548) | <0.001  |
| CKD                                     | 18,912                            | 81 ( 6.94% )               | 18,831 ( 2.25% )                | 1.27 ( 1.004-1.585)  | 0.040   |
| <b>Symptoms</b>                         |                                   |                            |                                 |                      |         |
| Haemoptysis                             | 982                               | 10 ( 0.86% )               | 972 ( 0.12% )                   | 5.08 ( 2.528-9.001)  | <0.001  |
| Pleural effusion                        | 2,356                             | 29 ( 2.49% )               | 2,327 ( 0.28% )                 | 4.13 ( 2.783-5.874)  | <0.001  |
| Cough                                   | 36,991                            | 112 ( 9.60% )              | 36,879 ( 4.41% )                | 2.108 ( 1.724-2.55)  | <0.001  |
| Abnormal weightloss                     | 5,804                             | 24 ( 2.06% )               | 5,780 ( 0.69% )                 | 2.01 ( 1.303-2.944)  | 0.001   |
| Dyspnea                                 | 3,757                             | 18 ( 1.54% )               | 3,739 ( 0.45% )                 | 1.877 ( 1.133-2.901) | 0.008   |
| Chest pain                              | 4,396                             | 15 ( 1.29% )               | 4,381 ( 0.52% )                 | 1.523 ( 1.217-1.882) | <0.001  |
| <b>Abnormal laboratory tests</b>        |                                   |                            |                                 |                      |         |
| C reactive protein                      | 8,520                             | 27 ( 2.31% )               | 8,493 ( 1.02% )                 | 1.771 ( 1.178,2.541) | 0.003   |
| Leukocytes count                        | 71,748                            | 185 ( 15.85% )             | 71,563 ( 8.57% )                | 1.483 ( 1.263,1.732) | <0.001  |
| Platelets                               | 51,499                            | 145 ( 12.43% )             | 51,354 ( 6.15% )                | 1.496 ( 1.251,1.775) | <0.001  |
| Glomerular filtration rate              | 18,711                            | 62 ( 5.31% )               | 18,649 ( 2.23% )                | 1.387 ( 1.062,1.776) | 0.013   |
| Glucose                                 | 103,764                           | 318 ( 27.25% )             | 103,446 ( 12.38% )              | 1.623 ( 1.423,1.846) | <0.001  |
| Neutrophils                             | 60,292                            | 177 ( 15.17% )             | 60,115 ( 7.20% )                | 1.705 ( 1.447,1.996) | <0.001  |
| Monocytes                               | 53,911                            | 159 ( 13.62% )             | 53,752 ( 6.43% )                | 1.63 ( 1.373,1.922)  | <0.001  |
| Lymphocytes                             | 52,227                            | 159 ( 13.62% )             | 52,068 ( 6.23% )                | 1.611 ( 1.357,1.9)   | <0.001  |
| Eosinophils                             | 46,278                            | 122 ( 10.45% )             | 46,156 ( 5.52% )                | 1.501 ( 1.238,1.804) | <0.001  |
| Alkaline phosphatase                    | 56,915                            | 161 ( 13.80% )             | 56,754 ( 6.79% )                | 1.517 ( 1.279,1.787) | <0.001  |
| <b>Medication of pulmonary diseases</b> |                                   |                            |                                 |                      |         |
| Albuterol sulfate                       | 5,084                             | 16 ( 1.37% )               | 5,068 ( 0.61% )                 | 5.708 ( 3.324,9.069) | <0.001  |
| Ipratropium bromide                     | 1,402                             | 7 ( 0.60% )                | 1,395 ( 0.17% )                 | 3.093 ( 1.323,6.027) | 0.003   |
| Ciprofloxacin hcl                       | 10,626                            | 39 ( 3.34% )               | 10,587 ( 1.27% )                | 1.816 ( 1.296,2.466) | <0.001  |
| Levofloxacin                            | 7,425                             | 67 ( 5.74% )               | 7,358 ( 0.88% )                 | 3.859 ( 2.982,4.907) | <0.001  |
| <b>Medicine of diabetes</b>             |                                   |                            |                                 |                      |         |
| Metformin hcl                           | 21,892                            | 91 ( 7.80% )               | 21,801 ( 2.61% )                | 1.933 ( 1.549,2.382) | <0.001  |
| Glipizide                               | 10,993                            | 47 ( 4.03% )               | 10,946 ( 1.31% )                | 1.51 ( 1.111,2)      | 0.006   |
| <b>Medication of CVDs</b>               |                                   |                            |                                 |                      |         |
| Amlodipine besylate                     | 19,490                            | 118 ( 10.11% )             | 19,372 ( 2.32% )                | 2.231 ( 1.832,2.691) | <0.001  |
| Diltiazem hcl                           | 1,990                             | 14 ( 1.20% )               | 1,976 ( 0.24% )                 | 2.248 ( 1.26,3.665)  | 0.003   |
| Valsartan                               | 3,953                             | 23 ( 1.97% )               | 3,930 ( 0.47% )                 | 1.933 ( 1.24,2.853)  | 0.002   |
| Losartan potassium                      | 13,337                            | 64 ( 5.48% )               | 13,273 ( 1.59% )                | 1.74 ( 1.337,2.222)  | <0.001  |
| Metoprolol tartrate                     | 18,617                            | 93 ( 7.97% )               | 18,524 ( 2.22% )                | 1.792 ( 1.438,2.205) | <0.001  |
| Lisinopril                              | 48,878                            | 215 ( 18.42% )             | 48,663 ( 5.82% )                | 1.889 ( 1.623,2.189) | <0.001  |
| Hydrochlorothiazide                     | 17,112                            | 84 ( 7.20% )               | 17,028 ( 2.04% )                | 2.054 ( 1.631,2.551) | <0.001  |
| Atenolol                                | 13,394                            | 68 ( 5.83% )               | 13,326 ( 1.59% )                | 1.804 ( 1.397,2.289) | <0.001  |
| <b>Medicine of mental disorders</b>     |                                   |                            |                                 |                      |         |
| Trazodone                               | 16,122                            | 71 ( 6.08% )               | 16,051 ( 1.92% )                | 2.611 ( 2.033,3.297) | <0.001  |
| Sertraline                              | 23,453                            | 83 ( 7.11% )               | 23,370 ( 2.80% )                | 2.148 ( 1.704,2.671) | <0.001  |
| Mirtazapine                             | 6,077                             | 25 ( 2.14% )               | 6,052 ( 0.72% )                 | 1.997 ( 1.306,2.905) | 0.001   |
| Lorazepam                               | 16,397                            | 84 ( 7.20% )               | 16,313 ( 1.95% )                | 2.825 ( 2.242,3.509) | <0.001  |
| Diazepam                                | 7,487                             | 25 ( 2.14% )               | 7,462 ( 0.89% )                 | 2.177 ( 1.424,3.165) | <0.001  |
| Bupropion                               | 14,384                            | 42 ( 3.60% )               | 5,654 ( 0.68% )                 | 2.27 ( 1.641,3.051)  | <0.001  |
| Aripiprazole                            | 3,629                             | 9 ( 0.77% )                | 3,620 ( 0.43% )                 | 2.745 ( 1.313,4.981) | 0.003   |
| Alprazolam                              | 8,228                             | 26 ( 2.23% )               | 8,202 ( 0.98% )                 | 1.686 ( 1.112,2.436) | 0.009   |

| Characteristic                           | Prospective cohort<br>(N=836,659) | Case<br>(N=1,167) | Control<br>(N=835,492) | Coefficients(95% CI)           | P value |
|------------------------------------------|-----------------------------------|-------------------|------------------------|--------------------------------|---------|
| <b>Utilizations in the last 6 months</b> |                                   |                   |                        |                                |         |
| Patient's estimated cost (US \$)         | 1629.599514                       | 4330.238218       | 1625.827311            | 2128.869 (1756.116,2501.622)   | <0.001  |
| Number of chronic conditions             | 2.81                              | 6.40              | 2.80                   | 1.573 (1.37,1.775)             | <0.001  |
| Mean of outpatient visits per person     | 3.69                              | 6.11              | 3.69                   | 1.486 (1.229,1.742)            | <0.001  |
| Mean of inpatient days per person        | 0.40                              | 1.62              | 0.40                   | 1.022 (0.727,1.316)            | <0.001  |
| Mean of inpatient admissions per person  | 0.08                              | 0.21              | 0.08                   | 0.104 (0.084,0.125)            | <0.001  |
| Mean of emergency visits per person      | 0.31                              | 0.41              | 0.31                   | 0.155 (0.107,0.203)            | <0.001  |
| <b>Social Determinants</b>               |                                   |                   |                        |                                |         |
| Low-educated population(%)               | 8.45                              | 8.95              | 8.45                   | 0.005 (0.003,0.007)            | <0.001  |
| High-educated population(%)              | 9.96                              | 9.36              | 9.96                   | -0.01 (-0.013,-0.006)          | <0.001  |
| Median household income, ZIP code        | 49243.84                          | 47387.79          | 49246.43               | -2441.741 (-3320.51,-1562.972) | <0.001  |
| Medicaid coverage(%)                     | 21.13                             | 22.49             | 21.12                  | 1.438 (0.918,1.957)            | <0.001  |
| Private Insurance coverage(%)            | 52.18                             | 51.19             | 52.18                  | -1.148 (-1.778,-0.519)         | <0.001  |
| Population within half-mile of park (%)  | 10.96                             | 10.29             | 10.96                  | -0.409 (-0.8,-0.018)           | 0.040   |
